# Supplementary material
Source: MDPI journal article supplement (https://www.mdpi.com/2073-4352/12/9/1312)
Supplement: s1 [file s1]

# Electrical and optical characterization of graphene oxide and reduced graphene oxide thin films

## Supplementary materials

SEM images of GO and RGO films were acquired on Si/SiO<sub>2</sub> substrates to improve GO visibility.

SEM analysis was accomplished with a FEI Quanta FEG 400 F eSEM microscope (Eindhoven, The Netherlands).

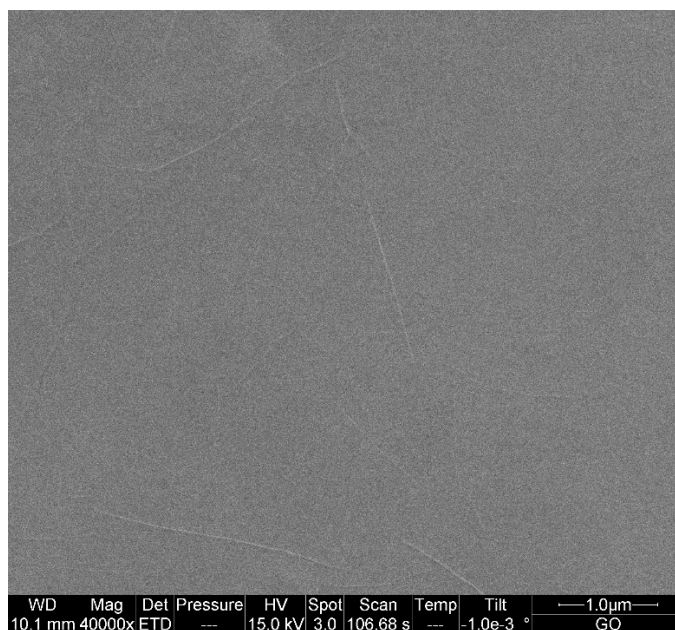

Figure S1: Scanning electron microscopy image of GO films on Si/SiO<sub>2</sub> substrates.

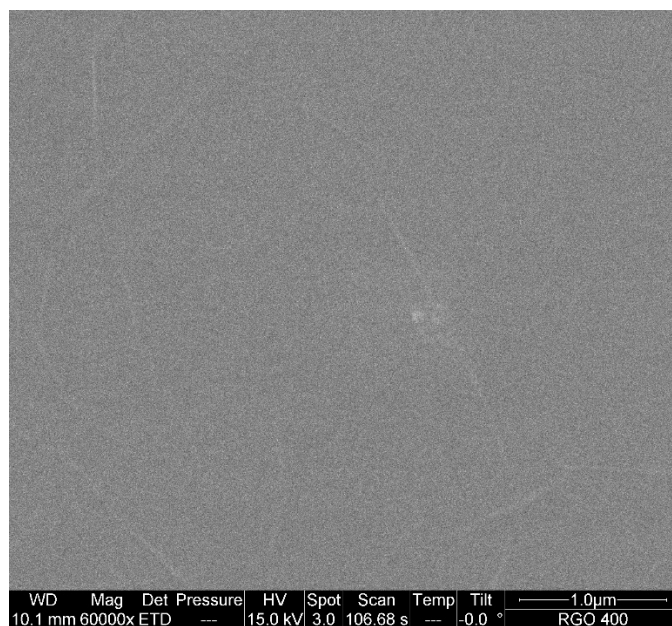

Figure S2: Scanning electron microscopy image of RGO films on Si/SiO<sub>2</sub> substrates.

Figure S1 shows that the GO film covers the whole surface uniformly. The topology of the samples does not change upon heating, as it is visible in Figure S2.
